# Supplementary material for: Enhanced surface hydrophilicity of thin-film composite membranes for nanofiltration: an experimental and DFT study
Source: Royal Society of Chemistry journal article supplement (doi:10.1039/c5cp04105h), 2015-01-01
Supplement: c5cp04105h1.pdf [file c5cp04105h1.pdf]

# Electronic Supplementary Information

## **Enhanced Surface Hydrophilicity of Thin-film Composite Membranes from N-(2-hydroxyethyl)ethylenediamine and Trimesoyl Chloride for Nanofiltration**

Zhiwei Lv, Jiahui Hu, Xuan Zhang\* and Lianjun Wang\*

Key Laboratory of Jiangsu Province for Chemical Pollution Control and Resources

Reuse, Nanjing University of Science & Technology, Nanjing 210094, China.

Corresponding author:

[xuanzhang@mail.njust.edu.cn](mailto:xuanzhang@mail.njust.edu.cn) (Xuan Zhang), Tel./fax: +86 25 84315827

[wanglj@mail.njust.edu.cn](mailto:wanglj@mail.njust.edu.cn) (Lianjun Wang)

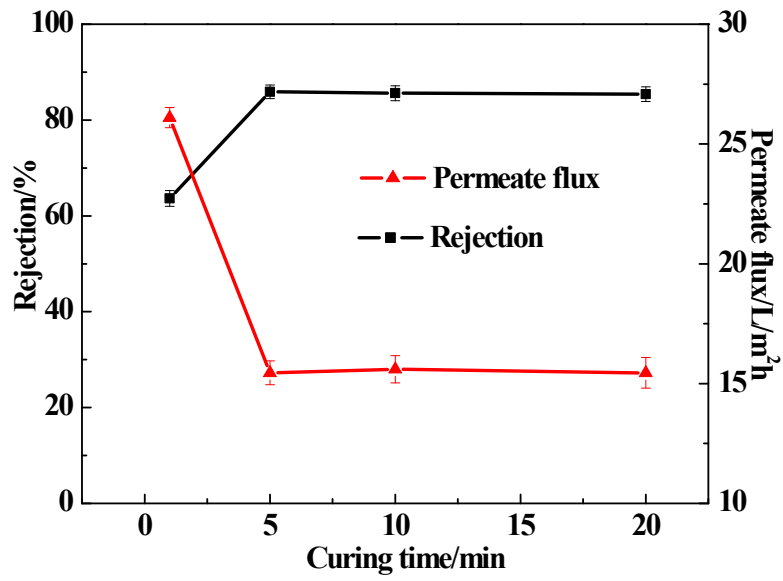

Fig.S1. Effect of curing time on the performance of the TFC membrane (X0.5Y0.1).

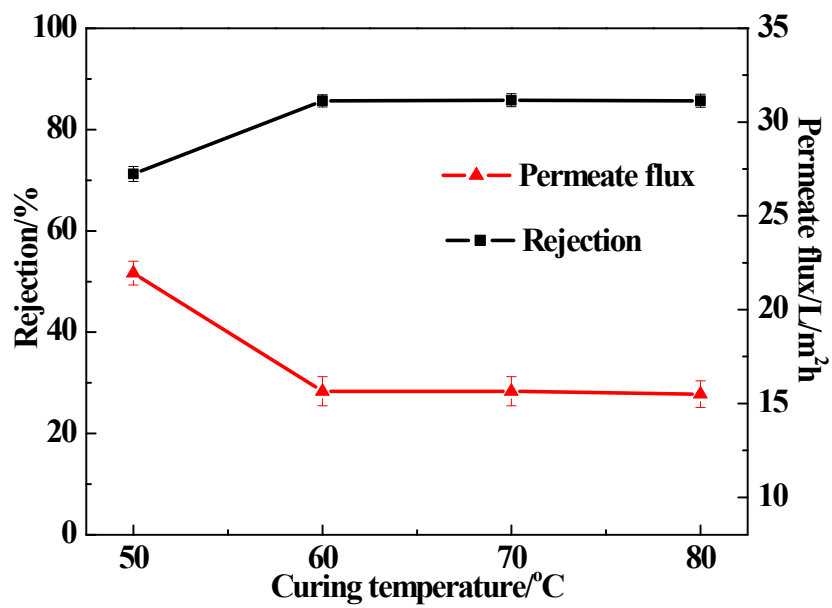

Fig.S2. Effect of curing temperature on the performance of the TFC membrane (X0.5Y0.1).

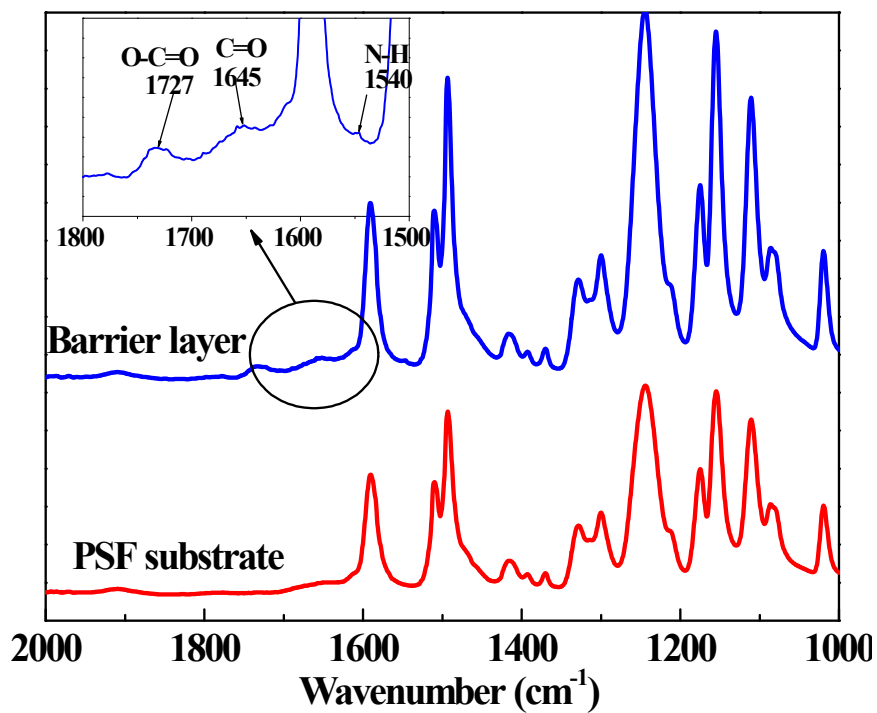

Fig. S3 FTIR spectra of the polyamide composite membrane and the support film.

Table S1 Solubility parameter of solvent, solute and polymer.

| Name        | Solubility parameter<br>(J/cm <sup>3</sup> ) <sup>1/2</sup> |
|-------------|-------------------------------------------------------------|
| Congo Red   | 36.6 <sup>a)</sup>                                          |
| Rhodamine B | 29.7 <sup>a)</sup>                                          |
| Polyamide   | 25.9 <sup>b)</sup>                                          |
| Water       | 47.9 <sup>c)</sup>                                          |

a) Obtained by MD method; b) Obtained by Synthia module; c) Obtained from ref.

(1).

## Reference

(1) Charles M. Hansen. Hansen Solubility Parameters A Users Handbook, 2<sup>nd</sup> Ed, CRC Press, Taylor & Francis Group, Boca Raton, 2007.
